# Supplementary material for: Stakeholders’ views of supporting asthma management in schools with a school-based asthma programme for primary school children: a qualitative study in Malaysia
Source: BMJ Open. 2022 Feb 7;12(2):e052058. doi: 10.1136/bmjopen-2021-052058 (PMC8823135; doi:10.1136/bmjopen-2021-052058)
Supplement: Supplementary data [file bmjopen-2021-052058supp002.pdf]

### Childhood Asthma Participant Interview Topic Guide (school staff)

#### Preamble:

- Ice-breaking and explain that there is no right or wrong answer
- Explain need to get consent for the interview and audio-recording. Obtain consents.
- Explain that the participant does not have to answer if he or she does not wish to do so

| Question                                                                                                                | Prompts                                                                                             |
|-------------------------------------------------------------------------------------------------------------------------|-----------------------------------------------------------------------------------------------------|
| <b>Asthma experience</b>                                                                                                |                                                                                                     |
| Tell us your experience in dealing with children with asthma?                                                           | Your child? Your student?                                                                           |
| What do you know about asthma?                                                                                          | Experience? Reading? Told by someone?                                                               |
| How do you know if a child's asthma is good or badly controlled?                                                        | Able to play? Easy breathing? No cough? How do you know about this?                                 |
| How does a child's asthma disturb/not disturb he/her? How?<br>How does a child's asthma disturbs/not disturb you? How?  | Activities affected e.g. attending school?<br><i>Pendidikan Jasmani dan kesehatan (PJK)/sports?</i> |
| In your opinion, how does having asthma makes a child feel?                                                             | Emotionally-friends isolation/bully? Shy to use medication?                                         |
| <b>Asthma treatment</b>                                                                                                 |                                                                                                     |
| Do you know of any asthma treatment?                                                                                    | Pills? MDI? Spacer? Aerochamber?                                                                    |
| How about complementary and alternative medicine for asthma?                                                            |                                                                                                     |
| <b>Asthma management at school</b>                                                                                      |                                                                                                     |
| What do you do when a student has an asthma attack?                                                                     | Inhaler? Go to the hospital/clinic? Call parents?                                                   |
| How do you recognise a severe asthma attack?<br>What would you do if this happened?                                     | Breathlessness? Unable to speak?                                                                    |
| Is there anything else you would do?                                                                                    | Concern on the administration of medication<br>eg MDI to student(s)? Rules or legislation?          |
| Is there any rules/limitation for students with asthma at school?                                                       | Sports? Physical activity? Extracurricular activities?                                              |
| Is there any asthma education or campaign at school?                                                                    | How is it delivered? By whom? To who?                                                               |
| What do you think about asthma education at school? Is it necessary?                                                    | Feasible? How best to deliver? Parents and school staffs involvement? How often?                    |
| What do you think if school staffs are allowed to deliver/supervise the use of asthma medication e.g inhaler at school? | Good? Not good? Concerns?                                                                           |

|                                                                                                                                                                   |                                                                                  |
|-------------------------------------------------------------------------------------------------------------------------------------------------------------------|----------------------------------------------------------------------------------|
| Suggestions/ideas for intervention?<br><br>Any suggestion on how to improve asthma management at school?                                                          | Others? Timing – during or after school?                                         |
| <b>Health belief about asthma</b><br><br>Why do you think a child has asthma?<br><br>What do you think a child can do to prevent asthma?                          | Inherited? Infection? Environment?<br><br>Avoidance of food? Medication? Sports? |
| <b>Source of information</b><br><br>Where and from whom did you get information about asthma?<br><br>Anything else that you want to share about childhood asthma? | Clinic? Family? Friends? Internet? How good is the information?                  |

**Childhood Asthma (CuT-AsthMa)**  
**Participant Interview Topic Guide (School Health Team)**

**Preamble:**

- Ice-breaking and explain that there is no right or wrong answer
- Explain the need to get consent for the interview and audio-recording. Obtain consents.
- Explain that the participant does not have to answer if he or she does not wish to do so

| Question                                                                         | Prompts                                                                   |
|----------------------------------------------------------------------------------|---------------------------------------------------------------------------|
| <b>Asthma experience</b>                                                         |                                                                           |
| Tell us your experience about dealing with children with asthma?                 | A student? A patient? Your own child?                                     |
| How do you know that they have asthma?                                           | Symptoms e.g cough, wheezing? Informed by parents?                        |
| How do you know if the child's asthma is good or badly controlled?               | Able to play? Easy breathing? No cough? Where do you know about this?     |
| How does a student's asthma disturb/not disturb him/her?                         | Physically? Activities affected at school e.g PJK, absent from school?    |
| How does a student's asthma disturbs/not disturb you? How?                       |                                                                           |
| In your opinion, how does having asthma makes a student feel?                    | Emotionally-friends isolation/bully? Shy to use medication?               |
| <b>Asthma treatment</b>                                                          |                                                                           |
| Do you know of any asthma treatment?                                             | Pills? MDI? Spacer? Aerochamber?                                          |
| How about complementary and alternative medication for asthma?                   |                                                                           |
| <b>Asthma management at school</b>                                               |                                                                           |
| What do you do when a student has asthma attack?                                 | Inhaler? Go to hospital/clinic? Asthma action plan? How do you know this? |
| How do you recognise a severe asthma attack? What would you do if this happened? | Breathlessness? Unable to speak?                                          |
| Is there anything else you would do?                                             |                                                                           |
|                                                                                  | Sports? Physical activity? Extracurricular activities?                    |

|                                                                                                                                                                                                                                                                                                                                                                                                                       |                                                                                                                                                                     |
|-----------------------------------------------------------------------------------------------------------------------------------------------------------------------------------------------------------------------------------------------------------------------------------------------------------------------------------------------------------------------------------------------------------------------|---------------------------------------------------------------------------------------------------------------------------------------------------------------------|
| <p>Is there any rules/limitation for students with asthma at school?</p> <p>Is there any asthma education or campaign at school?</p> <p>What do you think of asthma education at school? Is it necessary? Is it feasible?</p> <p>What is your opinion on teachers delivering/supervising the use of asthma medication e.g inhaler at school?</p> <p>Any suggestion on how to improve asthma management at school?</p> | <p>How is it delivered? By whom? To who?</p> <p>Feasible? How best to deliver? Parents and teachers involvement? How often?</p> <p>Good? Not good? Any worries?</p> |
| <p><b>Health belief about asthma</b></p> <p>Why do you think a child has asthma?</p> <p>What do you think a child can do to prevent asthma?</p>                                                                                                                                                                                                                                                                       | <p>Inherited? Infection? Environment?</p> <p>Avoidance of food? Medication? Sports?</p>                                                                             |
| <p><b>Source of information</b></p> <p>Where and from whom did you get information about asthma?</p> <p>Anything else that you want to share about asthma among children?</p>                                                                                                                                                                                                                                         | <p>Clinic? Family? Friends? Internet? How good is the information?</p>                                                                                              |

**Childhood Asthma (CuT-AsthMa)**  
**Participant focus group topic guide (Healthcare professionals/policymakers)**  
 (Interviews, which will be offered as an option to suit the convenience/preference of the participant, will follow the same topic guide)

**Preamble:**

- **Ice-breaking and explain that there is no right or wrong answer**
- **Explain the need to get consent for the focus group/interview and audio-recording. Obtain consents.**
- **Explain that the participant does not have to answer if he or she does not wish to do so**

| Question                                                                                                                  | Prompts                                                                       |
|---------------------------------------------------------------------------------------------------------------------------|-------------------------------------------------------------------------------|
| <b>Asthma experience</b>                                                                                                  |                                                                               |
| Tell us about your experience in dealing with children with asthma?                                                       | A student? A patient? Your child?                                             |
| How do you know that they have asthma?                                                                                    | Symptoms e.g cough, wheezing? Informed by parents?                            |
| How do you know if the child's asthma is good or badly controlled?                                                        | Able to play? Easy breathing? No cough? Where do you know about this?         |
| How does a student's asthma disturb/not disturb him/her?<br>How does a student's asthma disturbs/not disturb you?<br>How? | Physically? Activities affected at school e.g PJK, absent from school?        |
| In your opinion, how does having asthma makes a student feel?                                                             | Emotionally-friends isolation/bully? Shy to use medication?                   |
| <b>Asthma treatment</b>                                                                                                   |                                                                               |
| Do you know of any asthma treatment?                                                                                      | Pills? MDI? Spacer? Aerochamber?                                              |
| How about complementary and alternative medicine for asthma?                                                              |                                                                               |
| <b>Asthma management at school</b>                                                                                        |                                                                               |
| What do you do when a student has an asthma attack?                                                                       | Inhaler? Go to the hospital/clinic? Asthma action plan? How do you know this? |
| How do you recognise a severe asthma attack?<br>What would you do if this happened?                                       | Breathlessness? Unable to speak?                                              |
| Is there anything else you would do?                                                                                      | Sports? Physical activity? Extracurricular activities?                        |
| Is there any rules/limitation for students with asthma at school?                                                         | How is it delivered? By whom? To who?                                         |
| Is there any asthma education or campaign at school?                                                                      |                                                                               |
| What do you think of asthma education at school? Is it necessary? Is it feasible?                                         | Feasible? How best to deliver? Parents and teachers involvement? How often?   |

|                                                                                                                                                                                  |                                                                                  |
|----------------------------------------------------------------------------------------------------------------------------------------------------------------------------------|----------------------------------------------------------------------------------|
| What is your opinion on teachers delivering/supervising the use of asthma medication e.g inhaler at school?<br><br>Any suggestion on how to improve asthma management at school? | Good? Not good? Any worries?                                                     |
| <b>Health belief about asthma</b><br><br>Why do you think a child has asthma?<br><br>What do you think a child can do to prevent asthma?                                         | Inherited? Infection? Environment?<br><br>Avoidance of food? Medication? Sports? |
| <b>Source of information</b><br><br>Where and from whom did you get information about asthma?<br><br>Anything else that you want to share about asthma among children?           | Clinic? Family? Friends? Internet? How good is the information?                  |
